# Supplementary material for: Association between patient medications and postoperative outcomes in early-stage non-small cell lung cancer
Source: PubMed Central journal article supplement — J Thorac Dis. 2024 Oct 28;16(10):6727–39. doi: 10.21037/jtd-24-803 (PMC11565336; doi:10.21037/jtd-24-803), 2024-10-28
Supplement: jtd-16-10-6727-dss.pdf [file jtd-16-10-6727-dss.pdf]

## Data Sharing Statement

|                     |                                                                                                                                                    |                                                                                                                                                                                                                                                                                                                                              |
|---------------------|----------------------------------------------------------------------------------------------------------------------------------------------------|----------------------------------------------------------------------------------------------------------------------------------------------------------------------------------------------------------------------------------------------------------------------------------------------------------------------------------------------|
| <b>Article Info</b> | <a href="https://dx.doi.org/10.21037/jtd-24-803">https://dx.doi.org/10.21037/jtd-24-803</a>                                                        |                                                                                                                                                                                                                                                                                                                                              |
| <b>Item</b>         | <b>Question</b>                                                                                                                                    | <b>Authors' Response<br/>(place "-" if not applicable)</b>                                                                                                                                                                                                                                                                                   |
| 1                   | Would you like to share data collected for your study to others?                                                                                   | Yes.                                                                                                                                                                                                                                                                                                                                         |
| 2                   | If not, would you like to share the reason for your decision?                                                                                      | -                                                                                                                                                                                                                                                                                                                                            |
| 3                   | What data in particular will be shared?                                                                                                            | Deidentified data from the Veterans Affairs (VA) patient population discussed in the article will be made available upon request with appropriate institutional review board and VA approval as well as data use agreements. We may balance the potential benefits and risks of each request and then provide the data that could be shared. |
| 4                   | Any other documents will be share? Such as study protocol, statistical analysis plan, informed consent form, clinical study report, analytic code. | -                                                                                                                                                                                                                                                                                                                                            |
| 5                   | When will data availability begin?                                                                                                                 | At time of publication.                                                                                                                                                                                                                                                                                                                      |
| 6                   | When will data availability end?                                                                                                                   | Two years within the publication date, since the survival data may be updated over time.                                                                                                                                                                                                                                                     |
| 7                   | To whom will you share the data?                                                                                                                   | Employees of the VA system interested in clinical outcomes of lung cancer patients.                                                                                                                                                                                                                                                          |
| 8                   | For what type of analysis or purpose?                                                                                                              | For analysis of outcomes following lung cancer surgery.                                                                                                                                                                                                                                                                                      |
| 9                   | How or where can the data/documents be obtained?                                                                                                   | Emails can be sent to the address below to obtain the shared data: varunpuri@wustl.edu                                                                                                                                                                                                                                                       |
| 10                  | Any other restrictions?                                                                                                                            | The patient-level data that were used in this study are maintained by the US Department of VA. VA data are freely available to VA-affiliated researchers with VA-secured computing access and an appropriate VA study protocol approval.                                                                                                     |

|  |  |                                                                                                                                                                                                                                                                                    |
|--|--|------------------------------------------------------------------------------------------------------------------------------------------------------------------------------------------------------------------------------------------------------------------------------------|
|  |  | For more information, visit <a href="https://www.virec.research.va.gov">https://www.virec.research.va.gov</a> or contact the VA Information Resource Center at <a href="mailto:VIREC@va.gov">VIREC@va.gov</a> . Additional inquiries can be directed to the corresponding authors. |
|--|--|------------------------------------------------------------------------------------------------------------------------------------------------------------------------------------------------------------------------------------------------------------------------------------|
