# Supplementary material for: Association between patient medications and postoperative outcomes in early-stage non-small cell lung cancer
Source: PubMed Central journal article supplement — J Thorac Dis. 2024 Oct 28;16(10):6727–39. doi: 10.21037/jtd-24-803 (PMC11565336; doi:10.21037/jtd-24-803), 2024-10-28
Supplement: jtd-16-10-6727-supplementary.pdf [file jtd-16-10-6727-supplementary.pdf]

**Table S1** Comparison of statistical model performance with and without Charlson-Deyo Comorbidity Index

| Statistical Model                            | AIC       | aOR/aHR in model for total number of medications | 95% CI for total number of medications | aOR/aHR for CCI | 95% CI for CCI | C-statistic |
|----------------------------------------------|-----------|--------------------------------------------------|----------------------------------------|-----------------|----------------|-------------|
| Outcome: 30-day postoperative adverse events |           |                                                  |                                        |                 |                |             |
| (+) Medications (-) CCI                      | 7327.489  | 1.032                                            | 1.023, 1.041                           | N/A             | N/A            | 0.654       |
| (-) Medications (+) CCI                      | 7251.590  | N/A                                              | N/A                                    | 1.185           | 1.151, 1.221   | 0.669       |
| (+) Medications (+) CCI                      | 7241.985  | 1.016                                            | 1.007, 1.026                           | 1.163           | 1.127, 1.200   | 0.672       |
| Outcome: 90-day postoperative adverse events |           |                                                  |                                        |                 |                |             |
| (+) Medications (-) CCI                      | 7566.017  | 1.031                                            | 1.023, 1.040                           | N/A             | N/A            | 0.651       |
| (-) Medications (+) CCI                      | 7478.070  | N/A                                              | N/A                                    | 1.190           | 1.156, 1.224   | 0.668       |
| (+) Medications (+) CCI                      | 7469.864  | 1.015                                            | 1.006, 1.024                           | 1.169           | 1.134, 1.205   | 0.671       |
| Outcome: overall survival                    |           |                                                  |                                        |                 |                |             |
| (+) Medications (-) CCI                      | 88536.046 | 1.027                                            | 1.023, 1.031                           | N/A             | N/A            | 0.6377      |
| (-) Medications (+) CCI                      | 88483.721 | N/A                                              | N/A                                    | 1.112           | 1.097, 1.127   | 0.6398      |
| (+) Medications (+) CCI                      | 88414.940 | 1.019                                            | 1.014, 1.023                           | 1.088           | 1.072, 1.103   | 0.6441      |

(+) indicates that the listed variable was included in the multivariable analysis, (-) indicates that the listed variable was not included in the multivariable analysis.

**Table S2** Rate of major postoperative complications stratified by operation type

| Procedure type  | No major complication, n (%) | Major complication present, n (%) | P      |
|-----------------|------------------------------|-----------------------------------|--------|
| Lobectomy       | 5,860 (84.84)                | 1,047 (15.16)                     | <0.001 |
| Pneumonectomy   | 116 (1.38)                   | 39 (2.89)                         |        |
| Segmentectomy   | 483 (89.44)                  | 57 (4.22)                         |        |
| Wedge Resection | 1,931 (90.28)                | 208 (9.72)                        |        |

Major postoperative complications were defined as a diagnosis of a pneumonia, empyema, myocardial infarction, respiratory failure, renal failure, or stroke within 30 days after surgery. The interaction between medication count and surgical procedure was not significant in the model.
